# Supplementary material
Source: MDPI journal article supplement (https://www.mdpi.com/2076-3417/12/11/5429)
Supplement: s1 [file s1]

## Supplementary material

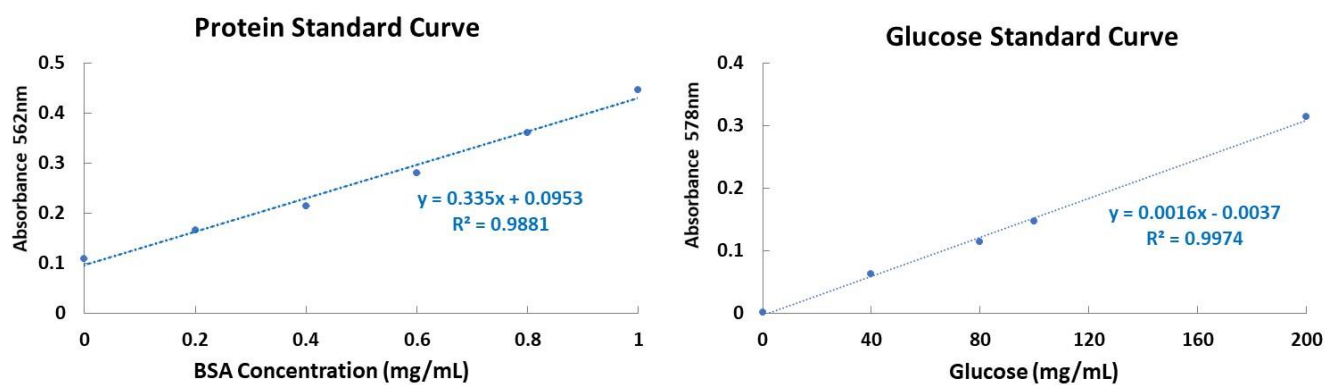

**Figure S1:** Protein and glucose standard curves for total protein and carbohydrate analyses

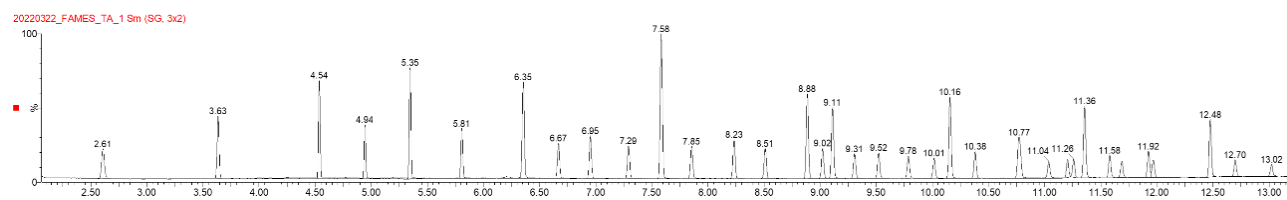

**Figure S2:** Representative GC-ToF-MS chromatogram of 37 FAME Mix (C8-C24) standard.

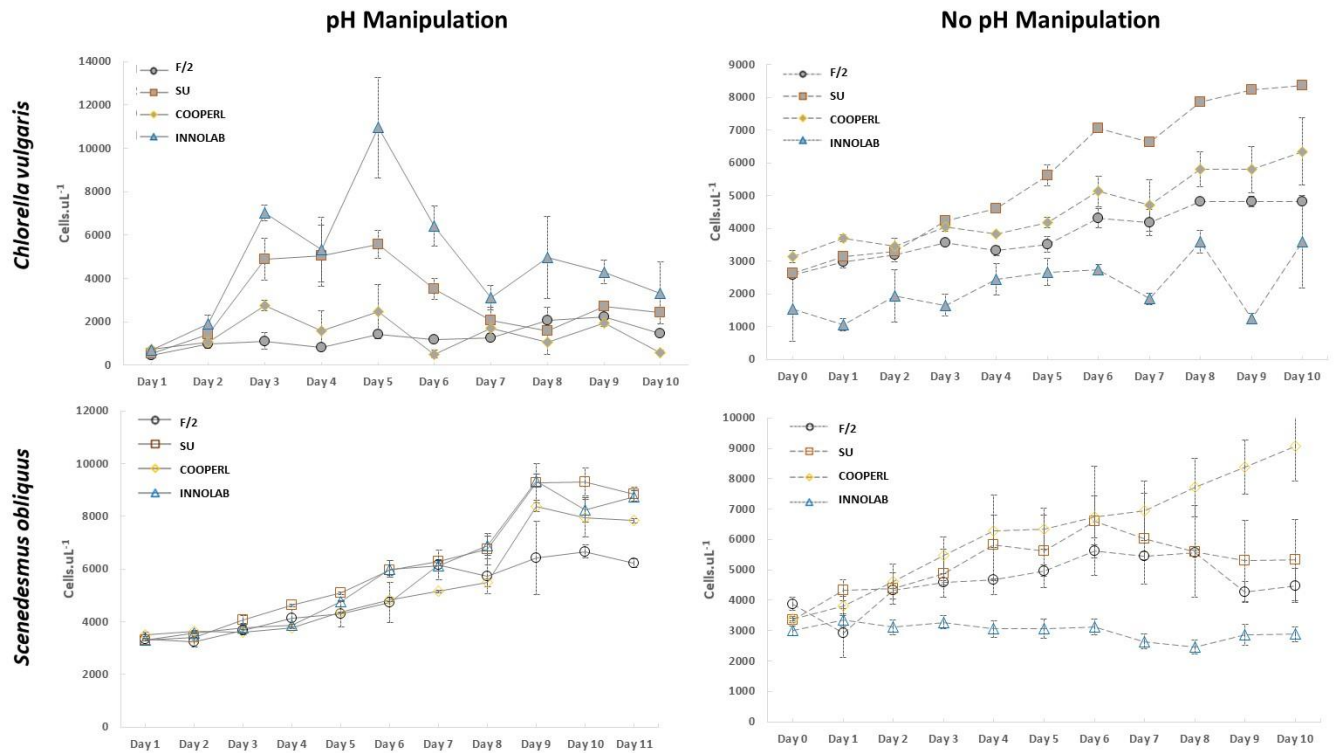

**Figure S3:** cell count per µL for *C. vulgaris* and *S. obliquus* grown on three different digestates under pH manipulation and no pH manipulation for 10 days of the experiment. Error bars represent the standard deviation on three replicates.

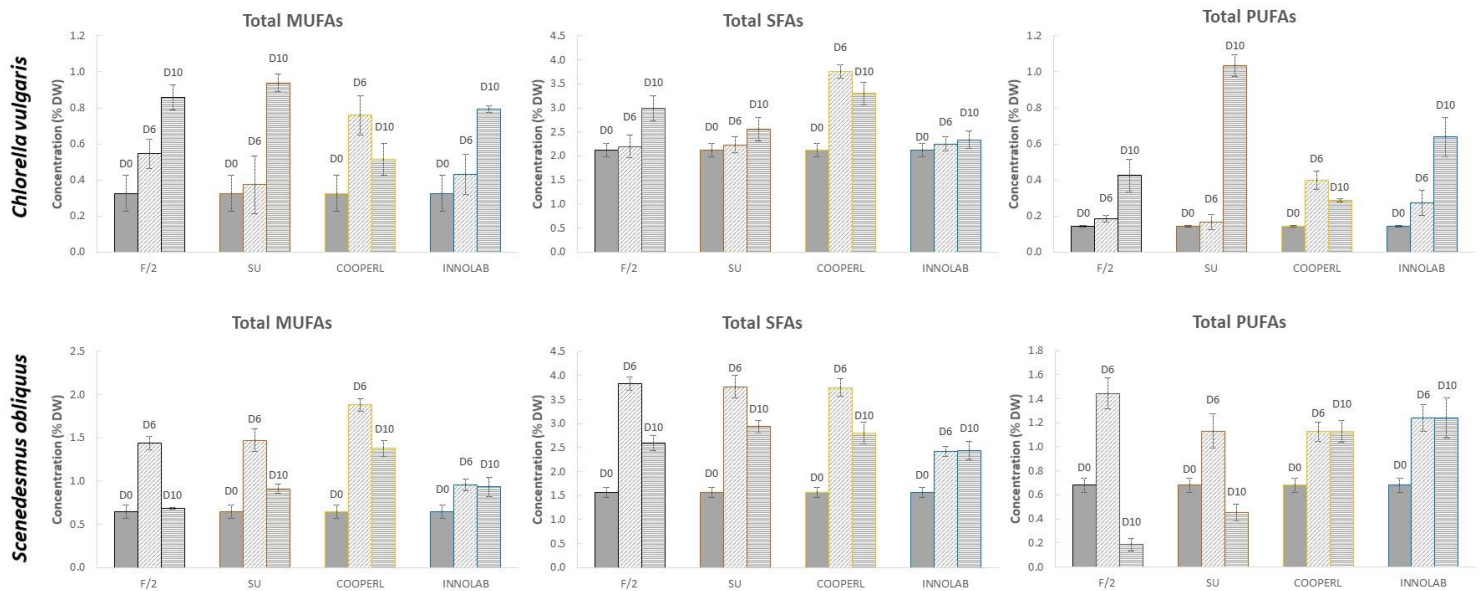

**Figure S4:** Total MUFAs, SFAs and PUFAs in cultures of *C. vulgaris* and *S. obliquus* grown on three different digestates under pH manipulation on day 0, 6 and 10 of the experiment. Error bars represent the standard deviation on three replicates.
